# Supplementary material for: Long-term outcome of severe herpes simplex encephalitis: a population-based observational study
Source: Springer Nature journal article supplement (doi:10.1186/s13054-015-1046-y), 2015-09-17
Supplement: MOESM1 [file 9780702]

**Additional figure 1** - Detailed characteristics of the patients admitted to intensive care units for Herpes simplex encephalitis during the study period.

| Patients | Age | BMI (kg/m <sup>2</sup> ) or Weight | Chronic medical condition                             | ICU admission motif | Vital parameters at admission |                  |                       | Biology at admission |            | Lumbar puncture findings       |                |                     | First brain imaging delay from symptoms onset (days) | Mechanical ventilation Duration (days) | Use of sedatives (days) | Fluid resuscitation during first 24h (L) | Vasopressors |                 | Renal Replacement therapy | ICU stay (days) | Glasgow Outcome Scale at one year | Follow-up      |
|----------|-----|------------------------------------|-------------------------------------------------------|---------------------|-------------------------------|------------------|-----------------------|----------------------|------------|--------------------------------|----------------|---------------------|------------------------------------------------------|----------------------------------------|-------------------------|------------------------------------------|--------------|-----------------|---------------------------|-----------------|-----------------------------------|----------------|
|          |     |                                    |                                                       |                     | GCS                           | Temperature (°C) | Blood Pressure (mmHg) | WBC (G/L)            | CRP (mg/L) | Leucocytes (/mm <sup>3</sup> ) | Lymphocyte (%) | Protein level (g/L) |                                                      |                                        |                         |                                          | Yes/no       | Duration (days) |                           |                 |                                   |                |
| 1        | 22  | 46kg                               | None                                                  | Seizure + coma      | 14                            | 38,6             | 145/80                | 10,3                 | 21,2       | 100                            | 90             | 1,24                | 5                                                    | 1                                      | 1                       | none                                     | No           | x               | no                        | 8               | 5                                 | UH then GP     |
| 2        | 77  | NA                                 | atrial fibrillation, chronic congestive heart failure | Seizure + coma      | 5                             | 38               | 111/70                | 13,8                 | NA         | 3                              | NA             | 0,57                | 2                                                    | 40                                     | 9                       | 1                                        | Yes          | 36              | no                        | 41              | 1                                 | Non applicable |
| 3        | 82  | 26                                 | Hypertension                                          | coma                | 14                            | 39               | 147/115               | 6,2                  | 177        | 15                             | 20             | 0,94                | 9                                                    | 31                                     | 4                       | 4                                        | Yes          | 4               | Yes (27 days)             | 44              | 4                                 | UH             |
| 4        | 42  | 32                                 | None                                                  | Coma                | 14                            | 38,6             | 178/93                | 10,1                 | 3,4        | 96                             | 59             | 2,43                | 4                                                    | 6                                      | 1                       | 0,5                                      | No           | x               | No                        | 24              | 3                                 | GP             |
| 5        | 34  | 17                                 | None                                                  | Coma                | 14                            | 36,9             | 138/72                | 6,4                  | <1         | 470                            | 90             | 2,59                | 8                                                    | x                                      | x                       | 2                                        | No           | x               | No                        | 7               | 5                                 | UH             |
| 6        | 68  | 32                                 | Asthma, Type II diabetes, obesity                     | coma                | 6                             | 40               | 83/44                 | 7,0                  | 4,6        | 800                            | 30             | 2,92                | 5                                                    | 15                                     | 4                       | 2                                        | Yes          | 7               | Yes (4 days)              | 23              | 4                                 | GP             |
| 7        | 57  | 20                                 | Alcohol abuse                                         | Coma                | 10                            | 38,4             | 130/75                | 7,9                  | 2,7        | 2300                           | 95             | 0,70                | 1                                                    | 6                                      | 0                       | none                                     | No           | x               | No                        | 10              | 4                                 | UH             |
| 8        | 71  | 22                                 | Rheumatoid arthritis (prednisone and methotrexate)    | Seizure + Coma      | 3                             | 38,8             | 143/88                | 9,9                  | 1,3        | 8                              | NA             | 0,51                | 4                                                    | 3                                      | 1                       | 1                                        | No           | x               | No                        | 3               | 5                                 | UH then GP     |
| 9        | 22  | 29                                 | None                                                  | meningitis syndrome | 15                            | 36,9             | 141/81                | 7,7                  | <1         | 684                            | 98             | 3,36                | 5                                                    | x                                      | x                       | None                                     | No           | x               | No                        | 2               | 5                                 | UH             |
| 10       | 48  | 26                                 | None                                                  | Delirium            | 15                            | 38               | 168/84                | 14,3                 | 23,6       | 110                            | 100%           | 1,11                | 6                                                    | x                                      | x                       | None                                     | No           | x               | No                        | 12              | 3                                 | UH             |
| 11       | 28  | NA                                 | None                                                  | meningitis syndrome | 15                            | 37,9             | 150/81                | 5,2                  | <1         | 69                             | 98             | 0,64                | 3                                                    | x                                      | x                       | None                                     | No           | x               | No                        | 6               | 5                                 | UH             |
| 12       | 59  | 67kg                               | None                                                  | Coma                | 14                            | 38               | 146/83                | 7,3                  | 3,3        | 21                             | 89             | 0,86                | 3                                                    | 10                                     | 10                      | 2                                        | Yes          | 10              | No                        | 10              | 1                                 | Non applicable |
| 13       | 31  | 16                                 | None                                                  | Seizure + Coma      | 7                             | 36,8             | 122/69                | 10,2                 | 199        | 30                             | 100            | 0,92                | 5                                                    | 17                                     | 16                      | None                                     | Yes          | 6               | No                        | 23              | 5                                 | UH             |
| 14       | 58  | 77kg                               | None                                                  | Coma                | 3                             | 36,9             | 1145/80               | 9,6                  | 22         | 24                             | 30             | 4                   | 7                                                    | 19                                     | 6                       | 1                                        | Yes          | 9               | No                        | 25              | 3                                 | UH             |

BMI: body mass index; GCS: Glasgow coma scale; GP: general practitioner; ICU: intensive care unit; NA: non available; UH: university hospital; WBC: white blood count
