# Supplementary material for: Long-term outcome of severe herpes simplex encephalitis: a population-based observational study
Source: Springer Nature journal article supplement (doi:10.1186/s13054-015-1046-y), 2015-09-17
Supplement: MOESM2 [file 9780702]

**Additional file 2**

Characteristics and management of the three patients who underwent decompressive craniectomy

|                                                   | <b>Patient A</b>                                                                                   | <b>Patient B</b>                                                                    | <b>Patient C</b>                                                                     |                                                                                       |
|---------------------------------------------------|----------------------------------------------------------------------------------------------------|-------------------------------------------------------------------------------------|--------------------------------------------------------------------------------------|---------------------------------------------------------------------------------------|
| <b>Age</b>                                        | 56                                                                                                 | 31                                                                                  | 58                                                                                   |                                                                                       |
| <b>Initial symptoms</b>                           | influenza-like syndrome, disorientation and agitation, fever                                       | Headache, fever                                                                     | Headache, left hemiparesis, fever                                                    |                                                                                       |
| <b>Initial radiologic findings</b>                | hypodensities of right temporal lobe, right insulae, right frontotemporal region, and frontal lobe | bilateral temporal hypodensities                                                    | bilateral temporal and frontal hypodensities with moderate mass effect               |                                                                                       |
| <b>Date of occurrence of cranial hypertension</b> | Day 4                                                                                              | Day 11                                                                              | Day 5                                                                                |                                                                                       |
| <b>Intracranial pressure monitoring</b>           | No                                                                                                 | Yes                                                                                 | No                                                                                   |                                                                                       |
| <b>Date of decompressive craniectomy</b>          | Day 6                                                                                              | Day 12                                                                              | Day 5                                                                                |                                                                                       |
| <b>One year outcome</b>                           | GOS 1                                                                                              | GOS 5                                                                               | GOS 3 (frontal syndrome)                                                             |                                                                                       |
| <b>CT Scan</b>                                    | Pre surgery                                                                                        |  |  |  |
|                                                   | Post surgery                                                                                       |  |  |  |
|                                                   | One year                                                                                           | Non available (death)                                                               |  |  |

GOS: Glasgow Outcome Scale ; CT: computed tomography.

Dates are given in days after the onset of symptoms.
