# Supplementary material for: Long-term outcome of severe herpes simplex encephalitis: a population-based observational study
Source: Springer Nature journal article supplement (doi:10.1186/s13054-015-1046-y), 2015-09-17
Supplement: MOESM4 [file 9780702]

**Additional file 3** - Literature review for adult case reports and series of patients undergoing decompressive craniectomy for severe herpes simplex encephalitis

| Author            | Age (year), Gender (Male - M, Female -F) | Time from hospitalisation to DC (days) | Time from beginning of the symptoms to DC (days) | Herniation ?                          | Surgical technic                                         | Complete Neurological recovery : Yes/No   |
|-------------------|------------------------------------------|----------------------------------------|--------------------------------------------------|---------------------------------------|----------------------------------------------------------|-------------------------------------------|
| Schwab            | 25, M                                    | 3                                      | >3                                               | Space occupying edema                 | Right hemispheric craniectomy                            | Yes                                       |
| Taferner          | 42, M                                    | NA                                     | NA                                               | Temporal herniation                   | Craniectomy + dural plasty + partial temporal lobectomy  | Yes                                       |
|                   | 25, F                                    | NA                                     | NA                                               | Temporal herniation                   | Craniectomy + dural plasty                               | Yes                                       |
| Yan               | 48, F                                    | 5                                      | 13                                               | Temporal herniation                   | Craniectomy + temporal lobectomy                         | Yes                                       |
|                   | 37, M                                    | 8/9                                    | 11                                               | Temporal herniation                   | Craniectomy + temporal lobectomy                         | Yes                                       |
| Mellado           | 21, F                                    | 1                                      | 9                                                | Temporal herniation                   | Hemicraniectomy + dural plasty                           | No: frontal syndrome, aphasia, epilepsy   |
| Midi              | 37, M                                    | 3                                      | 10                                               | Temporal herniation                   | Craniectomy + anterior temporal lobe resection           | yes                                       |
| Di Rienzo         | 60, M                                    | 7                                      | 7                                                | Temporal and transfalicine herniation | Craniectomy + dural plasty                               | Yes                                       |
| Adamo             | NA                                       | <2                                     | NA                                               | Temporal herniation                   | Craniectomy + anterior temporal lobectomy + dural plasty | Yes                                       |
|                   | NA                                       | <2                                     | NA                                               | Temporal herniation                   | Craniectomy + anterior temporal lobectomy + dural plasty | Yes                                       |
| González-Rabelino | 16, F                                    | 12                                     | 12                                               | Temporal herniation                   | hemicraniectomy                                          | Yes                                       |
| Maraite           | 66, F                                    | 3                                      | 6                                                | Temporal herniation                   | Hemicraniectomy + dural plasty                           | No: Memory troubles<br>Barthel Index = 70 |
| Pili-Floury       | 38, F                                    | 3                                      | 13                                               | Temporal herniation                   | Hemicraniectomy + dural plasty                           | Yes                                       |

DC: decompressive craniectomy; NA: non available
